# Supplementary material for: Iota-carrageenan neutralizes SARS-CoV-2 and inhibits viral replication in vitro
Source: PubMed Central journal article supplement (PMC7888609; doi:10.1371/journal.pone.0237480), 2021-02-17
Supplement: pone.0237480.s001.pdf [file pone.0237480.s001.pdf]

## S1\_Fig1\_final

| <b>Raw data</b>  | experiment 1 | experiment 2 | experiment 3 |
|------------------|--------------|--------------|--------------|
| negative control | 353          | 321          | 302          |
| positive control | 341508       | 336409       | 356675       |
| iota-carrageenan | 58283        | 44917        | 44541        |
| positive serum   | 34873        | 40506        | 35628        |
| negative serum   | 174192       | 215626       | 263060       |

| <b>Normalized relative values</b> | %      |
|-----------------------------------|--------|
| negative control                  | 0.119  |
| positive control                  | 100    |
| iota-carrageenan                  | 17.521 |
| positive serum                    | 14.002 |
| negative serum                    | 79.322 |
