# Supplementary material for: Iota-carrageenan neutralizes SARS-CoV-2 and inhibits viral replication in vitro
Source: PubMed Central journal article supplement (PMC7888609; doi:10.1371/journal.pone.0237480), 2021-02-17
Supplement: pone.0237480.s002.pdf [file pone.0237480.s002.pdf]

**S2\_Fig2\_final**

| <b>Raw data</b>             | experiment 1 | experiment 2 | experiment 3 | experiment 4 | experiment 5 | experiment 6 |
|-----------------------------|--------------|--------------|--------------|--------------|--------------|--------------|
| negative control            | 298          | 327          | 427          |              |              |              |
| positive control            | 57539        | 336409       | 356675       | 56640        | 49316        | 46937        |
| iota-carrageenan 100 µg/ml  | 9606         | 4209         | 4641         |              |              |              |
| iota-carrageenan 33 µg/ml   | 4583         | 10840        | 9001         |              |              |              |
| iota-carrageenan 10 µg/ml   | 11841        | 12407        | 8481         |              |              |              |
| iota-carrageenan 3.3 µg/ml  | 26152        | 19804        | 18955        |              |              |              |
| iota-carrageenan 1 µg/ml    | 47607        | 43362        | 41127        |              |              |              |
| iota-carrageenan 0.33 µg/ml | 60029        | 49171        | 42285        |              |              |              |

| <b>Normalized relative values</b> | %       |
|-----------------------------------|---------|
| negative control                  | 0       |
| positive control                  | 100     |
| iota-carrageenan 100 µg/ml        | 11.2111 |
| iota-carrageenan 33 µg/ml         | 16.9551 |
| iota-carrageenan 10 µg/ml         | 19.3043 |
| iota-carrageenan 3.3 µg/ml        | 41.2743 |
| iota-carrageenan 1 µg/ml          | 78.9695 |
| iota-carrageenan 0.33 µg/ml       | 88.8520 |
