# Supplementary material for: Iota-carrageenan neutralizes SARS-CoV-2 and inhibits viral replication in vitro
Source: PubMed Central journal article supplement (PMC7888609; doi:10.1371/journal.pone.0237480), 2021-02-17
Supplement: pone.0237480.s003.pdf [file pone.0237480.s003.pdf]

### S3\_Fig3\_final

| <b>Raw data</b>              | experiment 1 | experiment 2 | experiment 3 | experiment 4 | experiment 5 | experiment 6 |
|------------------------------|--------------|--------------|--------------|--------------|--------------|--------------|
| negative control             | 298          | 327          | 427          |              |              |              |
| positive control             | 57539        | 60358        | 53230        | 56640        | 49316        | 46937        |
| iota-carrageenan 100 µg/ml   | 9606         | 4209         | 4641         |              |              |              |
| iota-carrageenan 10 µg/ml    | 11841        | 12407        | 8481         |              |              |              |
| kappa-carrageenan 100 µg/ml  | 8688         | 15197        | 13010        |              |              |              |
| kappa-carrageenan 10 µg/ml   | 39523        | 32533        | 34596        |              |              |              |
| Fuc. U.p. 100 µg/ml          | 36097        | 35557        | 34647        |              |              |              |
| Fuc. U.p. 10 µg/ml           | 47014        | 41098        | 39751        |              |              |              |
| CMC 100 µg/ml                | 44998        | 39019        | 30523        |              |              |              |
| HPMC 100 µg/ml               | 50190        | 38436        | 35320        |              |              |              |
| Gal-4-SO4 100 µg/ml          | 52763        | 54605        | 48583        |              |              |              |
| negative control             | 900          | 624          | 450          |              |              |              |
| positive control             | 76976        | 77475        | 82829        | 81236        | 95552        | 87375        |
| lambda-carrageenan 100 µg/ml | 17056        | 21590        | 20210        |              |              |              |
| lambda-carrageenan 10 µg/ml  | 43301        | 56655        | 44895        |              |              |              |
| Fuc. F.v.100 µg/ml           | 36354        | 53291        | 39806        |              |              |              |
| Fuc. F.v.10 µg/ml            | 51225        | 60799        | 53998        |              |              |              |

| <b>Normalized relative values</b> | %       |
|-----------------------------------|---------|
| negative control                  | 0       |
| positive control                  | 100     |
| iota-carrageenan 100 µg/ml        | 13.9528 |
| iota-carrageenan 10 µg/ml         | 21.4936 |
| kappa-carrageenan 100 µg/ml       | 26.0188 |
| kappa-carrageenan 10 µg/ml        | 68.1859 |
| Fuc. U.p. 100 µg/ml               | 71.7140 |
| Fuc. U.p. 10 µg/ml                | 86.7733 |
| CMC 100 µg/ml                     | 68.1759 |

|                              |         |
|------------------------------|---------|
| HPMC 100 µg/ml               | 79.6628 |
| Gal-4-SO4 100 µg/ml          | 82.5848 |
| negative control             | 0       |
| positive control             | 100     |
| lambda-carrageenan 100 µg/ml | 22.8674 |
| lambda-carrageenan 10 µg/ml  | 57.4386 |
| Fuc. F.v.100 µg/ml           | 51.2476 |
| Fuc. F.v.10 µg/ml            | 65.9496 |
