# Supplementary material for: Iota-carrageenan neutralizes SARS-CoV-2 and inhibits viral replication in vitro
Source: PubMed Central journal article supplement (PMC7888609; doi:10.1371/journal.pone.0237480), 2021-02-17
Supplement: pone.0237480.s004.pdf [file pone.0237480.s004.pdf]

S4 Figure 4A and Table 2

(A) Experiment 1

| Concentration iota-carrageenan ( $\mu\text{g/ml}$ ) | Viral protein | Viral protein as % of untreated |
|-----------------------------------------------------|---------------|---------------------------------|
| (untreated) 0 $\mu\text{g/ml}$                      | 1448704,62    | 100,00                          |
| 3,75 $\mu\text{g/ml}$                               | 84735,66      | 5,85                            |
| 7,5 $\mu\text{g/ml}$                                | 136447,57     | 9,42                            |
| 37,5 $\mu\text{g/ml}$                               | 28451,97      | 1,96                            |
| 75 $\mu\text{g/ml}$                                 | 11669,61      | 0,81                            |

(B) Experiment 2

| Concentration iota-carrageenan ( $\mu\text{g/ml}$ ) | Viral protein | Viral protein as % of untreated |
|-----------------------------------------------------|---------------|---------------------------------|
| (untreated) 0 $\mu\text{g/ml}$                      | 948996,09     | 100,00                          |
| 3,75 $\mu\text{g/ml}$                               | 57691,82      | 6,08                            |
| 7,5 $\mu\text{g/ml}$                                | 86764,64      | 9,14                            |
| 37,5 $\mu\text{g/ml}$                               | -44333,55     | 0,00                            |
| 75 $\mu\text{g/ml}$                                 | -52459,73     | 0,00                            |

(C) Experiment 3

| Concentration iota-carrageenan ( $\mu\text{g/ml}$ ) | Viral protein | Viral protein as % of untreated |
|-----------------------------------------------------|---------------|---------------------------------|
| (untreated) 0 $\mu\text{g/ml}$                      | 251259,60     | 100,00                          |
| 3,75 $\mu\text{g/ml}$                               | 32152,34      | 12,80                           |
| 7,5 $\mu\text{g/ml}$                                | -28784,99     | 0,00                            |
| 37,5 $\mu\text{g/ml}$                               | 20678,12      | 8,23                            |
| 75 $\mu\text{g/ml}$                                 | 32041,81      | 12,75                           |

(D) Average of the three independent experiments (%).

| Concentration iota-carrageenan ( $\mu\text{g/ml}$ ) | Average % viral protein reduction (N=3) | Standard deviation |
|-----------------------------------------------------|-----------------------------------------|--------------------|
| (untreated) 0 $\mu\text{g/ml}$                      | 100,00                                  | 0                  |
| 3,75 $\mu\text{g/ml}$                               | 8,24                                    | 3,95               |
| 7,5 $\mu\text{g/ml}$                                | 6,19                                    | 5,36               |
| 37,5 $\mu\text{g/ml}$                               | 3,40                                    | 4,30               |
| 75 $\mu\text{g/ml}$                                 | 4,52                                    | 7,14               |

(E) Calculation of  $\text{IC}_{50}$  and Confidence Interval based on (D)

| $\text{IC}_{50}$ | Upper 95 % confidence interval | Lower 95 % confidence interval |
|------------------|--------------------------------|--------------------------------|
| 1,54             | 2.0259                         | 1,0452                         |

S5 Figure:

The original data of the reduction of SARS-CoV-2 viral protein (NP) by iota-carrageenan related to Figure 4 B (A -D) and Table 2 (E).
