# Supplementary material for: Iota-carrageenan neutralizes SARS-CoV-2 and inhibits viral replication in vitro
Source: PubMed Central journal article supplement (PMC7888609; doi:10.1371/journal.pone.0237480), 2021-02-17
Supplement: pone.0237480.s005.pdf [file pone.0237480.s005.pdf]

S5 Figure 4B and Table 2

(A) Experiment 1

| Concentration iota-carrageenan ( $\mu\text{g/ml}$ ) | RNA copies 1 | RNA copies 2 | MW (RNA copies 1 und RNA copies 2) | RNA copies as % of untreated |
|-----------------------------------------------------|--------------|--------------|------------------------------------|------------------------------|
| 0 $\mu\text{g/ml}$                                  | 1357476,50   | 1380222,75   | 1368849,63                         | 100,00                       |
| 3,75 $\mu\text{g/ml}$                               | 47958,42     | 52857,27     | 50407,84                           | 3,68                         |
| 7,5 $\mu\text{g/ml}$                                | 15094,15     | 15729,43     | 15411,79                           | 1,13                         |
| 37,5 $\mu\text{g/ml}$                               | 3098,96      | 3838,68      | 3468,82                            | 0,25                         |
| 75 $\mu\text{g/ml}$                                 | 5566,67      | 5232,05      | 5399,36                            | 0,39                         |

(B) Experiment 2

| Concentration iota-carrageenan ( $\mu\text{g/ml}$ ) | RNA copies 1 | RNA copies 2 | MW (RNA copies 1 und RNA copies 2) | RNA copies as % of untreated |
|-----------------------------------------------------|--------------|--------------|------------------------------------|------------------------------|
| 0 $\mu\text{g/ml}$                                  | 973357,13    | 972236,44    | 972796,78                          | 100,00                       |
| 3,75 $\mu\text{g/ml}$                               | 6474,80      | 25632,62     | 16053,71                           | 1,65                         |
| 7,5 $\mu\text{g/ml}$                                | 6691,26      | 5863,20      | 6277,23                            | 0,65                         |
| 37,5 $\mu\text{g/ml}$                               | 4033,56      | 4045,49      | 4039,53                            | 0,42                         |
| 75 $\mu\text{g/ml}$                                 | 3441,48      | 3391,41      | 3416,44                            | 0,35                         |

(C) Experiment 3

| Concentration iota-carrageenan ( $\mu\text{g/ml}$ ) | RNA copies 1 | RNA copies 2 | MW (RNA copies 1 und RNA copies 2) | RNA copies as % of untreated |
|-----------------------------------------------------|--------------|--------------|------------------------------------|------------------------------|
| 0 $\mu\text{g/ml}$                                  | 323516,69    | 310431,19    | 316973,94                          | 100,00                       |
| 3,75 $\mu\text{g/ml}$                               | 77383,48     | 72176,66     | 74780,07                           | 23,59                        |
| 7,5 $\mu\text{g/ml}$                                | 12099,64     | 11074,50     | 11587,07                           | 3,66                         |
| 37,5 $\mu\text{g/ml}$                               | 2641,06      | 2512,82      | 2576,94                            | 0,81                         |
| 75 $\mu\text{g/ml}$                                 | 134,52       | 1754,97      | 944,75                             | 0,30                         |

(D) Average of the three independent experiments (%).

| Concentration iota-carrageenan ( $\mu\text{g/ml}$ ) | Average % RNA copy reduction | Standard deviation |
|-----------------------------------------------------|------------------------------|--------------------|
| 0 $\mu\text{g/ml}$                                  | 100,00                       | 0                  |
| 3,75 $\mu\text{g/ml}$                               | 9,64                         | 12,124             |
| 7,5 $\mu\text{g/ml}$                                | 1,81                         | 1,618              |
| 37,5 $\mu\text{g/ml}$                               | 0,49                         | 0,288              |
| 75 $\mu\text{g/ml}$                                 | 0,35                         | 0,0483             |

(E) Calculation of  $\text{IC}_{50}$  and Confidence Interval based on (D)

| $\text{IC}_{50}$ | Upper 95 % confidence interval | Lower 95 % confidence interval |
|------------------|--------------------------------|--------------------------------|
| 0,0464           | 0,1835                         | -0,0908                        |

S4 Figure 4A:

The original data of the reduction of SARS-CoV-2 viral RNA copy number by iota-carrageenan related to Figure 4 B (A -D) and Table 2 (E).
