# Supplementary material for: Iota-carrageenan neutralizes SARS-CoV-2 and inhibits viral replication in vitro
Source: PubMed Central journal article supplement (PMC7888609; doi:10.1371/journal.pone.0237480), 2021-02-17
Supplement: pone.0237480.s006.pdf [file pone.0237480.s006.pdf]

S6 Figure 5 and Table 2

(A) Raw data. Extinction of untreated control was set to 100 %.

| Experiment # | untreated | iota-carrageenan ( $\mu\text{g/ml}$ ) |       |        |        |        | Staurosporin [M] |
|--------------|-----------|---------------------------------------|-------|--------|--------|--------|------------------|
|              |           | 0,01                                  | 0,1   | 1,0    | 10,0   | 100,0  |                  |
| 1            | 100       | 96,37                                 | 94,38 | 100,65 | 110,13 | 128,26 | 60,84            |
| 2            | 100       | 83,47                                 | 83,03 | 88,95  | 100,14 | 107,18 | 23,42            |
| 3            | 100       | 83,65                                 | 82,13 | 79,54  | 93,20  | 118,82 | 25,06            |

(B) Average of the three independent experiments (%).

| Experiment #         | % of untreated control | iota-carrageenan ( $\mu\text{g/ml}$ ) |       |       |        |        | Staurosporin [M] |
|----------------------|------------------------|---------------------------------------|-------|-------|--------|--------|------------------|
|                      |                        | 0,01                                  | 0,1   | 1,0   | 10,0   | 100,0  |                  |
| Average (Exp. 1 – 3) | 100                    | 87,83                                 | 86,51 | 89,71 | 101,16 | 118,09 | 36,44            |
| Standard deviation   | 0                      | 7,40                                  | 6,83  | 10,58 | 8,51   | 10,56  | 21,15            |

S6 Figure 5:

The original data of the toxicity of iota-carrageenan on Vero B4 cells related to Figure 5 (A) Raw data with untreated control set to 100 % (B) Average of 3 independent experiments
