# Supplementary material for: Iota-carrageenan neutralizes SARS-CoV-2 and inhibits viral replication in vitro
Source: PubMed Central journal article supplement (PMC7888609; doi:10.1371/journal.pone.0237480), 2021-02-17
Supplement: pone.0237480.s007.pdf [file pone.0237480.s007.pdf]

**S7\_tab2\_final**

| <b>Raw data</b>                 | exp.1 | exp.2 | exp. 3 | exp. 4 | exp.t 5 | exp.6 | exp.7 | exp. 8 | exp. 9 | exp. 10 |
|---------------------------------|-------|-------|--------|--------|---------|-------|-------|--------|--------|---------|
| negative control                | 0.326 | 0.265 | 0.132  | 0.197  | 0.226   |       |       |        |        |         |
| positive control                | 1.019 | 1.121 | 0.998  | 0.991  | 1.169   | 0.917 | 1.131 | 1.207  | 1.010  | 0.944   |
| iota-carrageenan<br>100 µg/ml   | 0.275 | 0.279 | 0.244  | 0.236  | 0.329   |       |       |        |        |         |
| iota-carrageenan<br>3 µg/ml     | 0.372 | 0.277 | 0.315  | 0.300  | 0.270   |       |       |        |        |         |
| iota-carrageenan<br>9 µg/ml     | 0.391 | 0.250 | 0.252  | 0.315  | 0.291   |       |       |        |        |         |
| iota-carrageenan<br>2.7 µg/ml   | 0.289 | 0.324 | 0.294  | 0.293  | 0.334   |       |       |        |        |         |
| iota-carrageenan<br>0.8 µg/ml   | 0.578 | 0.863 | 0.480  | 1.279  | 0.436   |       |       |        |        |         |
| iota-carrageenan<br>0.24 µg/ml  | 0.453 | 0.523 | 0.506  | 0.909  | 0.766   |       |       |        |        |         |
| iota-carrageenan<br>0.07 µg/ml  | 0.460 | 0.684 | 0.623  | 1.221  | 0.712   |       |       |        |        |         |
| iota-carrageenan<br>0.02 µg/ml  | 0.662 | 0.988 | 0.937  | 1.000  | 1.157   |       |       |        |        |         |
| iota-carrageenan<br>0.007 µg/ml | 0.691 | 0.752 | 0.978  | 1.270  | 0.996   |       |       |        |        |         |

| <b>Normalized relative values</b> | <b>%</b> |
|-----------------------------------|----------|
| negative control                  | 0        |
| positive control                  | 100      |
| iota-carrageenan 100 µg/ml        | 5.2830   |
| iota-carrageenan 3 µg/ml          | 9.4461   |
| iota-carrageenan 9 µg/ml          | 8.5940   |
| iota-carrageenan 2.7 µg/ml        | 9.4461   |
| iota-carrageenan 0.8 µg/ml        | 60.6208  |
| iota-carrageenan 0.24 µg/ml       | 48.9592  |
| iota-carrageenan 0.07 µg/ml       | 62.1789  |
| iota-carrageenan 0.02 µg/ml       | 87.5959  |
| iota-carrageenan 0.007 µg/ml      | 86.2082  |

Raw data in table for SSPL, SARS-CoV-2 (Westernblot), and SARS-CoV-2 (PCR) are integrated into S4 Fig4a\_Tab 2\_final and S5 Fig4b\_Tab2\_final.
